# Supplementary material for: High-resolution melting PCR assay, applicable for diagnostics and screening studies, allowing detection and differentiation of several Babesia spp. infecting humans and animals
Source: PubMed Central journal article supplement (PMC5599466; doi:10.1007/s00436-017-5576-x), 2017-08-10
Supplement: 436_2017_5576_MOESM3_ESM.pdf [file 436_2017_5576_MOESM3_ESM.pdf]

**Figure S1. Reproducibility of HRM curves.**

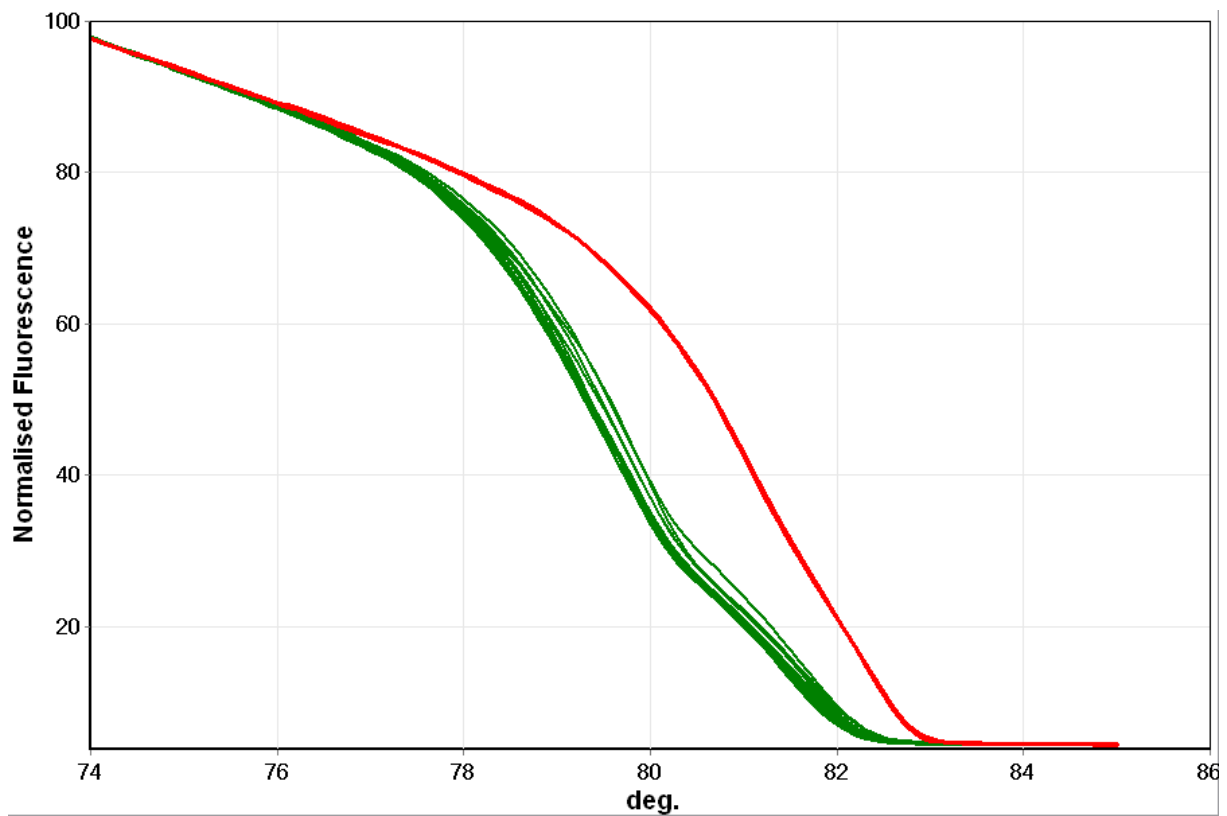

Red - melting curves of *B. microti* obtained in mPCR-HRM performed on DNA isolated from 5 distinct *Microtus oeconomus* blood samples.

Green - melting curves of *B. canis* obtained in mPCR-HRM performed on DNA isolated from 10 distinct *Canis canis* (dog) blood samples.
